# Supplementary material for: The Role of Large Mammals as Vitamin C Sources for MIS 3 Hominins
Source: MDPI journal article supplement (doi:10.3390/quat6010020), 2023-03-10
Supplement: s1 [file s1]

**Supporting Table S4.** Organ weights, kcal and ascorbic acid content of a medium-sized bison (~910 kg)<sup>a</sup>

|                          | Body%   | g         | Energy<br>kcal/g | Total kcal | Vit C<br>mg/g | Vit C in organs<br>mg | Reference for Vit C                                                                         | Reference for %organ wt                       | Reference for Energy                                                                     |
|--------------------------|---------|-----------|------------------|------------|---------------|-----------------------|---------------------------------------------------------------------------------------------|-----------------------------------------------|------------------------------------------------------------------------------------------|
| <i>Viscera</i>           |         |           |                  |            |               |                       |                                                                                             |                                               |                                                                                          |
| Adrenal                  | 0.0073  | 66.4      | 0.680            | 46         | 0.392         | 26.0                  | Rodahl (1949) <sup>b</sup>                                                                  | Crile and Quiring (1940) <sup>c</sup>         | Estimated as testes                                                                      |
| Bile                     | 0.0398  | 362.3     | 0.045            | 16         | 0.01          | 3.6                   | Rodahl (1949) <sup>b</sup>                                                                  | Kirton <i>et al.</i> (1972) <sup>d</sup>      | Derived from Barrett (2012) <sup>e</sup>                                                 |
| Blood                    | 3.4052  | 30,987.1  | 0.700            | 21,691     | 0.0007        | 21.7                  | Richmond <i>et al.</i> (1940) <sup>f</sup>                                                  | Awuk and Tamir (2007) <sup>f</sup>            | Nollet and Toldrá (2011) <sup>f</sup>                                                    |
| Brain                    | 0.0860  | 782.6     | 1.235            | 967        | 0.128         | 100.2                 | Rodahl (1949) <sup>b</sup>                                                                  | Crile and Quiring (1940) <sup>g</sup>         | Guil-Guerrero (2017) <sup>h</sup>                                                        |
| Digestive tract          | 5.3000  | 48,230.0  | 0.960            | 46,301     | 0.074         | 3569.0                | Rodahl (1949) <sup>b</sup>                                                                  | Crile and Quiring (1940) <sup>f</sup>         | Kuhnlein and Soueida (1992) <sup>i</sup>                                                 |
| Epididymis               | 0.1098  | 999.0     | 0.680            | 679        | 0.042         | 42.0                  | Rodahl (1949) <sup>b</sup>                                                                  | Bercovitch and Rodriguez (1993) <sup>j</sup>  | Estimated as testes                                                                      |
| Eyes                     | 0.0393  | 357.9     | 3.260            | 1167       | 0.007         | 2.5                   | Rodahl (1949) <sup>b</sup>                                                                  | Crile and Quiring (1940) <sup>d</sup>         | USDA, FDC ID: 169801 <sup>i</sup>                                                        |
| Heart                    | 0.4769  | 4339.8    | 1.120            | 4861       | 0.015         | 65.1                  | Fediuk <i>et al.</i> (2002) <sup>i</sup>                                                    | Crile and Quiring (1940) <sup>g</sup>         | Kuhnlein and Soueida (1992) <sup>i</sup> ;<br>Kuhnlein <i>et al.</i> (2002) <sup>i</sup> |
| Kidney                   | 0.2404  | 2187.6    | 0.917            | 2006       | 0.059         | 129.1                 | Fediuk <i>et al.</i> (2002) <sup>i</sup>                                                    | Crile and Quiring (1940) <sup>g</sup>         | Guil-Guerrero (2017) <sup>h</sup>                                                        |
| Liver                    | 1.0157  | 9242.9    | 1.240            | 11,461     | 0.104         | 961.3                 | Fediuk <i>et al.</i> (2002) <sup>i</sup> ; Hassan<br><i>et al.</i> (2012) <sup>i</sup>      | Crile and Quiring (1940) <sup>g</sup>         | Kuhnlein <i>et al.</i> (2002) <sup>i</sup>                                               |
| Lung                     | 1.3528  | 12,310.5  | 1.090            | 13,418     | 0.081         | 997.1                 | Rodahl (1949) <sup>b</sup>                                                                  | Crile and Quiring (1940) <sup>d</sup>         | Kuhnlein and Soueida (1992) <sup>i</sup>                                                 |
| Pancreas                 | 0.1405  | 1278.6    | 2.350            | 3005       | 0.039         | 49.9                  | Rodahl (1949) <sup>b</sup>                                                                  | Sebsibe <i>et al.</i> (2007) <sup>f</sup>     | USDA, FDC ID: 169452 <sup>k</sup>                                                        |
| Spleen                   | 0.2284  | 2078.5    | 0.901            | 1873       | 0.06          | 124.7                 | Rodahl (1949) <sup>b</sup>                                                                  | Crile and Quiring (1940) <sup>b</sup>         | Guil-Guerrero (2017) <sup>h</sup>                                                        |
| Testes                   | 0.5160  | 4695.9    | 0.680            | 3193       | 0.182         | 854.6                 | Rodahl (1949) <sup>b</sup>                                                                  | Kirton <i>et al.</i> (1972) <sup>d</sup>      | USDA, FDC ID: 172619 <sup>d</sup>                                                        |
| Tongue                   | 0.1891  | 1720.7    | 2,600            | 4474       | 0.01          | 17.2                  | Rodahl (1949) <sup>b</sup>                                                                  | Kirton <i>et al.</i> (1972) <sup>d</sup>      | USDA, FDC ID: 168985 <sup>i</sup>                                                        |
| Thyroid                  | 0.0196  | 178.2     | 0.680            | 125        | 0.038         | 6.8                   | Rodahl (1949) <sup>b</sup>                                                                  | Crile and Quiring (1940) <sup>d</sup>         | Estimated as testes                                                                      |
| <i>Total viscera</i>     | 13.1668 | 119,817.8 | -                | 115,276    | -             | 6970.8                | -                                                                                           | -                                             | -                                                                                        |
| Bones                    | 14.2750 | 129,902.5 | -                | -          | -             | -                     | -                                                                                           | Adamczewski <i>et al.</i> (1997) <sup>b</sup> | -                                                                                        |
| Bone marrow              | 2.5000  | 22,750.0  | 4.837            | 110,042    | 0.0000        | -                     | Hassan <i>et al.</i> (2012) <sup>i</sup>                                                    | Nieminen and Laitinen (1986) <sup>i</sup>     | Guil-Guerrero (2017) <sup>h</sup>                                                        |
| Dissectible fat          | 17.7099 | 161,160.3 | 6.828            | 1,100,403  | 0.0000        | 0.0000                | Geraci and Smith (1979) <sup>i</sup> ;<br>Hassan <i>et al.</i> (2012) <sup>i</sup>          | Adamczewski <i>et al.</i> (1997) <sup>b</sup> | Guil-Guerrero (2017) <sup>l</sup>                                                        |
| <i>Total fat</i>         | 20.2099 | 183,910.3 | -                | 1,210,444  | -             | -                     | -                                                                                           | -                                             | -                                                                                        |
| <i>Muscles</i>           | 41.9084 | 381,366.4 | 1.090            | 415,689    | 0.0000        | 0.0000                | Driskell <i>et al.</i> (2004) <sup>l</sup> ;<br>Marchello <i>et al.</i> (2001) <sup>l</sup> | Adamczewski <i>et al.</i> (1997) <sup>b</sup> | USDA, FDC ID: 173851 <sup>l</sup>                                                        |
| <i>Skin</i>              | 9.0043  | 81,939.2  | 3.5              | 286,787    | 0.0050        | 409.7                 | USDA, FDC ID: 2341308 <sup>m</sup>                                                          | Awuk and Tamir (2007) <sup>f</sup>            | USDA, FDC ID: 2341308 <sup>m</sup>                                                       |
| <i>Rest</i> <sup>n</sup> | 3.6675  | 33,374.1  | 1.000            | 33,374     | 0.0010        | 33.4                  | Estimated                                                                                   | Estimated                                     | Estimated                                                                                |

<sup>a</sup> Live weight from Martin *et al.* (2018); <sup>b</sup> Muskox sample; <sup>c</sup> Red deer sample; <sup>d</sup> Sheep sample; <sup>e</sup> Based on 0.51% fats in bile; <sup>f</sup> Goat sample; <sup>g</sup> Buffalo sample; <sup>h</sup> Mean for several food animals; <sup>i</sup> *Rangifer* sample; <sup>j</sup> Macaco sample; <sup>k</sup> Beef sample; <sup>l</sup> Bison sample; <sup>m</sup> Pork skin rinds; <sup>n</sup> Tendon, blood vessels, etc.

## References

- Adamczewski, J. Z., P. F. Flood, and A. Gunn. 1997. Seasonal Patterns in Body Composition and Reproduction of Female Muskoxen (*Ovibos Moschatus*). *Journal of Zoology* 241(2):245-269. <https://doi.org/10.1111/j.1469-7998.1997.tb01956.x>
- Awuk, Asnakew, and Berhan Tamir. 2007. Feed Intake, Weight Gain and Carcass Yield Characteristics of Intact Hararghe Highland Male Goats Fed on Different Hay to Concentrate Ratios. *East African Journal of Sciences* 1(1):45-54. <https://doi.org/10.4314/eajsci.v1i1.40340>
- Barrett, Kim E. 2012. *Ganong's review of medical physiology* (24th ed.). New York: McGraw-Hill Medical.
- Bercovitch, Fred B., and Jose F. Rodriguez. 1993. Testis size, epididymis weight, and sperm competition in rhesus macaques. *American journal of primatology* 30(2):163-168. <https://doi:10.1002/ajp.1350300208>
- Crile, George, and Daniel P. Quiring. 1940. A record of the body weight and certain organ and gland weights of 3,690 animals. *Ohio Journal of Science* 15:219-259. <https://doi.org/10.1016/B978-0-12-815599-8.00010-1>
- Driskell, Judy A., Martin J. Marchello, David W. Giraud, and Ahmad Sulaeman. 2004. Vitamin and selenium content of ribeye cuts from grass-and grain-finished bison of the same herd. *Journal of Food Quality* 27(5):388-398. <https://doi.org/10.1111/j.1745-4557.2004.00680.x>
- Fediuk, Karen, Nick Hidioglou, René Madère, and Harriet V. Kuhnlein. 2002. Ascorbic acid in Inuit traditional food and women's diets. *Journal of food Composition and Analysis* 15(3):221-235. <https://doi.org/10.1006/jfca.2002.1053>
- Geraci, Joseph R., and Thomas G. Smith. 1979. Ascorbic acid in the diet of Inuit hunters from Holman, Northwest Territories. *Arctic* 135-139.
- Guil-Guerrero, José L. 2017. Evidence for chronic omega-3 fatty acids and ascorbic acid deficiency in Palaeolithic hominins in Europe at the emergence of cannibalism. *Quaternary Science Reviews* 157:176-187. <https://doi.org/10.1016/j.quascirev.2016.12.016>

- Hassan, Ammar Ali, Torkjel M. Sandanger, and Magritt Brustad. 2012. Level of selected nutrients in meat, liver, tallow and bone marrow from semi-domesticated reindeer (*Rangifer t. tarandus* L.). *International journal of circumpolar health* 71(1):17997. <https://doi.org/10.3402/ijch.v71i0.17997>
- Kirton, A. H., P. D. Fourie, and K. E. Jury. 1972. Growth and development of sheep: III. Growth of the carcass and non-carcass components of the Southdown and Romney and their cross and some relationships with composition. *New Zealand Journal of Agricultural Research* 15:214-227. <https://doi.org/10.1080/00288233.1972.10421249>
- Kuhnleini, Harriet V., and Rula Soueida. 1992. Use and nutrient composition of traditional Baffin Inuit foods. *Journal of Food Composition and Analysis* 5(2):112-126. [https://doi.org/10.1016/0889-1575\(92\)90026-G](https://doi.org/10.1016/0889-1575(92)90026-G)
- Kuhnlein, H. V., H. M. Chan, D. Legge, and V. Barthet. 2002. Macronutrient, mineral and fatty acid composition of Canadian Arctic traditional food. *Journal of food composition and analysis* 15(5), 545-566. <https://doi.org/10.1006/jfca.2002.1066>
- Marchello, Martin J., and Judy A. Driskell. 2001. Nutrient composition of grass-and grain-finished bison. *Great Plains Research* 65-82. <https://www.jstor.org/stable/23775641>
- Martin, Jeff M., Jim I. Mead, and Perry S. Barboza. 2018. Bison body size and climate change. *Ecology and Evolution* 8(9):4564-4574. <https://doi.org/10.1002/ece3.4019>
- Nieminen, Mauri, and Matti Laitinen. 1986. Bone marrow and kidney fat as indicators of condition in reindeer. *Rangifer* 6:219-226. <https://doi.org/10.7557/2.6.2.649>
- Nollet, Leo M. L., and Fidel Toldrá, eds. 2011. *Handbook of Analysis of Edible Animal By-Products*. CRC PressRichmond, M. S., Satterfield, G. H., Grinnells, C. D., & Dann, W. J. (1940). Ascorbic Acid Content of Goat's Milk and Blood: Influence of Ascorbic Acid Injection and Diet: Three Figures. *The Journal of Nutrition*, 20(2), 99-108. <https://doi.org/10.1093/jn/20.2.99>

Richmond, Martha S., G. H. Satterfield, C. D. Grinnells, and W. J. Dann. 1940. Ascorbic Acid Content of Goat's Milk and Blood: Influence of Ascorbic Acid Injection and Diet: Three Figures. *The Journal of Nutrition* 20(2):99-108. <https://doi.org/10.1093/jn/20.2.99>

Rodahl, Kåre 1949. Vitamin sources in Arctic regions. *Norsk Polarinstitutt Skrifter* 91:1-47.

Sebsibe, A., N. H. Casey, W. A. Van Niekerk, A. Tegegne, and R. J. Coertze. 2007. Growth performance and carcass characteristics of three Ethiopian goat breeds fed grainless diets varying in concentrate to roughage ratios. *South African Journal of Animal Science* 37(4):221-232.

<https://doi.org/10.4314/sajas.v37i4.4094>

USDA National Nutrient Database for Standard Reference Legacy Release. <https://ndb.nal.usda.gov>
