# Supplementary material for: The Role of Large Mammals as Vitamin C Sources for MIS 3 Hominins
Source: MDPI journal article supplement (doi:10.3390/quat6010020), 2023-03-10
Supplement: s1 [file s1]

**Supporting Table S1.** Organ weights, kcal and ascorbic acid content of a medium-sized reindeer (135 kg)<sup>a</sup>

|                          | Body%   | g        | Energy<br>kcal/g | Total kcal | Vit C<br>mg/g | Vit C in organs<br>mg | Reference for Vit C                                                                                                        | Reference for %organ wt                       | Reference for Energy                                                                     |
|--------------------------|---------|----------|------------------|------------|---------------|-----------------------|----------------------------------------------------------------------------------------------------------------------------|-----------------------------------------------|------------------------------------------------------------------------------------------|
| <i>Viscera</i>           |         |          |                  |            |               |                       |                                                                                                                            |                                               |                                                                                          |
| Adrenal                  | 0.0043  | 5.8      | 0.680            | 4          | 0.3920        | 2.3                   | Rodahl (1949) <sup>b</sup>                                                                                                 | Crile and Quiring (1940) <sup>c</sup>         | Estimated as testes                                                                      |
| Bile                     | 0.0398  | 53.8     | 0.045            | 2          | 0.0100        | 0.5                   | Rodahl (1949) <sup>b</sup>                                                                                                 | Kirton <i>et al.</i> (1972) <sup>d</sup>      | Derived from Barrett (2012) <sup>e</sup>                                                 |
| Blood                    | 3.4052  | 4597.0   | 0.700            | 3218       | 0.0007        | 3.2                   | Richmond <i>et al.</i> (1940) <sup>f</sup>                                                                                 | Awuk and Tamir (2007) <sup>f</sup>            | Nollet and Toldrá (2011) <sup>f</sup>                                                    |
| Brain                    | 0.2210  | 298.3    | 1.370            | 409        | 0.128         | 38.2                  | Rodahl (1949) <sup>b</sup>                                                                                                 | Crile and Quiring (1940) <sup>d</sup>         | Kuhnlein and Soueida (1992) <sup>c</sup>                                                 |
| Digestive tract          | 5.3000  | 7155.0   | 0.960            | 6869       | 0.0045        | 32.2                  | Fediuk <i>et al.</i> (2002) <sup>c</sup>                                                                                   | Crile and Quiring (1940) <sup>f</sup>         | Kuhnlein and Soueida (1992) <sup>c</sup>                                                 |
| Epididymis               | 0.1098  | 148.2    | 0.680            | 101        | 0.0420        | 6.2                   | Rodahl (1949) <sup>b</sup>                                                                                                 | Bercovitch and Rodriguez (1993) <sup>g</sup>  | Estimated as testes                                                                      |
| Eyes                     | 0.0393  | 53.1     | 3.260            | 173        | 0.0070        | 0.4                   | Rodahl (1949) <sup>b</sup>                                                                                                 | Crile and Quiring (1940) <sup>d</sup>         | USDA, FDC ID: 169801 <sup>c</sup>                                                        |
| Heart                    | 0.7843  | 10,58.8  | 1.120            | 1186       | 0.0260        | 27.5                  | Fediuk <i>et al.</i> (2002) <sup>c</sup>                                                                                   | Crile and Quiring (1940) <sup>c</sup>         | Kuhnlein and Soueida (1992) <sup>c</sup> ;<br>Kuhnlein <i>et al.</i> (2002) <sup>c</sup> |
| Kidney                   | 0.1119  | 151.0    | 0.917            | 138        | 0.0888        | 13.4                  | Fediuk <i>et al.</i> (2002) <sup>c</sup>                                                                                   | Crile and Quiring (1940) <sup>c</sup>         | Guil-Guerrero (2017) <sup>h</sup>                                                        |
| Liver                    | 1.7729  | 2393.5   | 1.240            | 2968       | 0.1782        | 426.5                 | Fediuk <i>et al.</i> (2002) <sup>c</sup> ; Hassan <i>et al.</i> (2012) <sup>c</sup>                                        | Crile and Quiring (1940) <sup>c</sup>         | Kuhnlein <i>et al.</i> (2002) <sup>c</sup>                                               |
| Lung                     | 1.7693  | 2388.6   | 1.090            | 2604       | 0.0810        | 193.5                 | Rodahl (1949) <sup>b</sup>                                                                                                 | Crile and Quiring (1940) <sup>c</sup>         | Kuhnlein and Soueida (1992) <sup>c</sup>                                                 |
| Pancreas                 | 0.1405  | 189.7    | 2.350            | 446        | 0.0390        | 7.4                   | Rodahl (1949) <sup>b</sup>                                                                                                 | Sebsibe <i>et al.</i> (2007) <sup>f</sup>     | USDA, FDC ID: 169452 <sup>i</sup>                                                        |
| Spleen                   | 0.2239  | 302.2    | 0.901            | 272        | 0.0600        | 18.1                  | Rodahl (1949) <sup>b</sup>                                                                                                 | Crile and Quiring (1940) <sup>c</sup>         | Guil-Guerrero (2017) <sup>h</sup>                                                        |
| Testes                   | 0.5160  | 696.6    | 0.680            | 474        | 0.1820        | 126.8                 | Rodahl (1949) <sup>b</sup>                                                                                                 | Kirton <i>et al.</i> (1972) <sup>d</sup>      | USDA, FDC ID: 172619 <sup>d</sup>                                                        |
| Tongue                   | 0.1891  | 255.3    | 2.600            | 664        | 0.0100        | 2.6                   | Rodahl (1949) <sup>b</sup>                                                                                                 | Kirton <i>et al.</i> (1972) <sup>d</sup>      | USDA, FDC ID: 168985 <sup>c</sup>                                                        |
| Thyroid                  | 0.0060  | 8.2      | 0.680            | 6          | 0.0380        | 0.3                   | Rodahl (1949) <sup>b</sup>                                                                                                 | Kirton <i>et al.</i> (1972) <sup>d</sup>      | Estimated as testes                                                                      |
| <i>Total viscera</i>     | 14.6334 | 19,755.1 | -                | 19,532     | -             | 899.1                 | .                                                                                                                          | -                                             | -.                                                                                       |
| <i>Bones</i>             | 14.2750 | 19,271.3 | -                | -          | -             | -                     | .                                                                                                                          | Adamczewski <i>et al.</i> (1997) <sup>b</sup> | -                                                                                        |
| Bone marrow              | 2.5000  | 3375.0   | 4.837            | 16,325     | 0.0000        | 0.000                 | Hassan <i>et al.</i> (2012) <sup>c</sup>                                                                                   | Niemenen and Laitinen (1986) <sup>c</sup>     | Guil-Guerrero (2017) <sup>h</sup>                                                        |
| <i>Disectible fat</i>    | 17.7099 | 23,908.4 | 7,638            | 182,612    | 0.0090        | 215.2                 | Geraci and Smith (1979) <sup>c</sup> ;<br>Hassan <i>et al.</i> (2012) <sup>c</sup>                                         | Adamczewski <i>et al.</i> (1997) <sup>b</sup> | Guil-Guerrero (2017) <sup>c</sup>                                                        |
| <i>Total fat</i>         | 20.2099 | 27,283.4 | -                | 198,937    | -             | 215.2                 | -                                                                                                                          | -                                             | -                                                                                        |
| <i>Muscles</i>           | 41.9080 | 56,575.8 | 1.161            | 65,685     | 0.0075        | 424.3                 | Fediuk <i>et al.</i> (2002) <sup>c</sup> ; Geraci and Smith (1979) <sup>c</sup> ; Hassan <i>et al.</i> (2012) <sup>c</sup> | Adamczewski <i>et al.</i> (1997) <sup>b</sup> | Guil-Guerrero (2017) <sup>c</sup>                                                        |
| <i>Skin</i>              | 9.0043  | 12,155.8 | 5.44             | 66,128     | 0.0050        | 60.8                  | USDA, FDC ID: 2341308 <sup>j</sup>                                                                                         | Awuk and Tamir (2007) <sup>f</sup>            | USDA, FDC ID: 2341308 <sup>j</sup>                                                       |
| <i>Rest</i> <sup>k</sup> | 3.6675  | 4951.1   | 1.000            | 4951       | 0.0010        | 5.0                   | Estimated                                                                                                                  | Estimated                                     | Estimated                                                                                |

<sup>a</sup> Body weight was taken from Knott *et al.* (2005); <sup>b</sup> Muskox sample; <sup>c</sup> *Rangifer* sample; <sup>d</sup> Sheep sample; <sup>e</sup> Based on 0.51% fats in bile; <sup>f</sup> Goat sample; <sup>g</sup> Macaco samples; <sup>h</sup> Mean values obtained from several food animals; <sup>i</sup> Beef sample; <sup>j</sup> Pork skin rinds; <sup>k</sup> Tendon, blood vessels, etc.

## References

- Adamczewski, J. Z., P. F. Flood, and A. Gunn. 1997. Seasonal Patterns in Body Composition and Reproduction of Female Muskoxen (*Ovibos Moschatus*). *Journal of Zoology* 241(2):245-269. <https://doi.org/10.1111/j.1469-7998.1997.tb01956.x>
- Alfaia, C.M., M.S. Madeira, J. Pestana, D. Coelho, P.A. Lopes, P. A., Toldrá, and J. A. M. Prates. 2019. Pork Byproducts. Byproducts from Agriculture and Fisheries. In Simpson, Benjamin K., Alberta N. Aryee, and Fidel Toldrá, eds. *Byproducts from Agriculture and Fisheries* (pp. 19–41). John Wiley & Sons Ltd.
- Awuk, Asnakew, and Berhan Tamir. 2007. Feed Intake, Weight Gain and Carcass Yield Characteristics of Intact Hararghe Highland Male Goats Fed on Different Hay to Concentrate Ratios. *East African Journal of Sciences* 1(1):45-54. <https://doi.org/10.4314/eajsci.v1i1.40340>
- Barrett, Kim E. 2012. *Ganong's review of medical physiology* (24th ed.). New York: McGraw-Hill Medical.
- Bercovitch, Fred B., and Jose F. Rodriguez. 1993. Testis size, epididymis weight, and sperm competition in rhesus macaques. *American journal of primatology* 30(2):163-168. <https://doi:10.1002/ajp.1350300208>
- Crile, George, and Daniel P. Quiring. 1940. A record of the body weight and certain organ and gland weights of 3,690 animals. *Ohio Journal of Science* 15:219-259. <https://doi.org/10.1016/B978-0-12-815599-8.00010-1>
- Fediuk, Karen, Nick Hidioglou, René Madère, and Harriet V. Kuhnlein. 2002. Ascorbic acid in Inuit traditional food and women's diets. *Journal of food Composition and Analysis* 15(3):221-235. <https://doi.org/10.1006/jfca.2002.1053>
- Geraci, Joseph R., and Thomas G. Smith. 1979. Ascorbic acid in the diet of Inuit hunters from Holman, Northwest Territories. *Arctic* 135-139.
- Guil-Guerrero, José L. 2017. Evidence for chronic omega-3 fatty acids and ascorbic acid deficiency in Palaeolithic hominins in Europe at the emergence of cannibalism. *Quaternary Science Reviews* 157:176-187. <https://doi.org/10.1016/j.quascirev.2016.12.016>
- Hassan, Ammar Ali, Torkjel M. Sandanger, and Magritt Brustad. 2012. Level of selected nutrients in meat, liver, tallow and bone marrow from semi-domesticated reindeer (*Rangifer t. tarandus* L.). *International journal of circumpolar health* 71(1):17997. <https://doi.org/10.3402/ijch.v71i0.17997>

Kirton, A. H., P. D. Fourie, and K. E. Jury. 1972. Growth and development of sheep: III. Growth of the carcass and non-carcass components of the Southdown and Romney and their cross and some relationships with composition. *New Zealand Journal of Agricultural Research* 15:214-227.

<https://doi.org/10.1080/00288233.1972.10421249>

Knott, Katrina K., Perry S. Barboza, and R. Terry Bowyer. 2005. Growth in arctic ungulates: postnatal development and organ maturation in *Rangifer tarandus* and *Ovibos moschatus*. *Journal of Mammalogy* 86(1):121-130. [https://doi.org/10.1644/1545-1542\(2005\)086<0121:GIAUPD>2.0.CO;2](https://doi.org/10.1644/1545-1542(2005)086<0121:GIAUPD>2.0.CO;2)

Kuhnleini, Harriet V., and Rula Soueida. 1992. Use and nutrient composition of traditional Baffin Inuit foods. *Journal of Food Composition and Analysis* 5(2):112-126. [https://doi.org/10.1016/0889-1575\(92\)90026-G](https://doi.org/10.1016/0889-1575(92)90026-G)

Kuhnlein, H. V., H. M. Chan, D. Legge, and V. Barthet. 2002. Macronutrient, mineral and fatty acid composition of Canadian Arctic traditional food. *Journal of food composition and analysis* 15(5), 545-566. <https://doi.org/10.1006/jfca.2002.1066>

Nieminen, Mauri, and Matti Laitinen. 1986. Bone marrow and kidney fat as indicators of condition in reindeer. *Rangifer* 6:219-226. <https://doi.org/10.7557/2.6.2.649>

Nollet, Leo M. L., and Fidel Toldrá, eds. 2011. *Handbook of Analysis of Edible Animal By-Products*. CRC Press.

Richmond, Martha S., G. H. Satterfield, C. D. Grinnells, and W. J. Dann. 1940. Ascorbic Acid Content of Goat's Milk and Blood: Influence of Ascorbic Acid Injection and Diet: Three Figures. *The Journal of Nutrition* 20(2):99-108. <https://doi.org/10.1093/jn/20.2.99>

Rodahl, Kåre 1949. Vitamin sources in Arctic regions. *Norsk Polarinstitutt Skrifter* 91:1-47.

Sebsibe, A., N. H. Casey, W. A. Van Niekerk, A. Tegegne, and R. J. Coertze. 2007. Growth performance and carcass characteristics of three Ethiopian goat breeds fed grainless diets varying in concentrate to roughage ratios. *South African Journal of Animal Science* 37(4):221-232. <https://doi.org/10.4314/sajas.v37i4.4094>

USDA National Nutrient Database for Standard Reference Legacy Release. <https://ndb.nal.usda.gov>
