# Supplementary material for: The Role of Large Mammals as Vitamin C Sources for MIS 3 Hominins
Source: MDPI journal article supplement (doi:10.3390/quat6010020), 2023-03-10
Supplement: s1 [file s1]

**Supporting Table S7.** Daily needs of energy, meat, and fatty tissues for a 2.5 g protein/kg·day muskox-fed 22-individuals O3H group

| Age group   | %  | N° of individuals<br>(average) <sup>a</sup> | Energy expenditure by<br>individual (kcal) <sup>b</sup> | Energy expenditure by<br>group (kcal) | meat             |               | fatty tissues    |               |
|-------------|----|---------------------------------------------|---------------------------------------------------------|---------------------------------------|------------------|---------------|------------------|---------------|
|             |    |                                             |                                                         |                                       | Energy<br>(kcal) | Amount<br>(g) | Energy<br>(kcal) | Amount<br>(g) |
| Neonathes   | 5  | 1.068                                       | 1,000                                                   | 1,068                                 | 157              | 139           | 908              | 115           |
| Child       | 14 | 3.097                                       | 2,000                                                   | 6,194                                 | 910              | 805           | 5,267            | 668           |
| Juvenile    | 15 | 3.204                                       | 2,500                                                   | 8,010                                 | 1,177            | 1,041         | 6,811            | 863           |
| Adolescent  | 18 | 3.951                                       | 3,500                                                   | 13,830                                | 2,032            | 1,798         | 11,761           | 1,491         |
| Young adult | 39 | 8.544                                       | 4,500                                                   | 38,447                                | 5,648            | 4,998         | 32,694           | 4,144         |
| Old adult   | 10 | 2.136                                       | 4,000                                                   | 8,544                                 | 1,255            | 1,111         | 7,265            | 921           |
| <i>SUM</i>  |    | 22                                          |                                                         | 76,092                                | 11,178           | 9,892         | 64,706           | 8,201         |

<sup>a</sup> According to palaeodemographic data for Palaeolithic populations (Trinkaus, 1995, 2011); <sup>b</sup> According to Dietary Guidelines for Americans (2010)

## References

Dietary Guidelines for Americans. 2010. United States Department of Agriculture and United States Department of Health and Human Services. 7th Edition, Washington, DC: U.S. Government Printing Office, December 2010. <http://www.dietaryguidelines.gov>.

Trinkaus, Erik. 1995. Neanderthal mortality patterns. *Journal of Archaeological science* 22(1):121-142. [https://doi.org/10.1016/S0305-4403\(95\)80170-7](https://doi.org/10.1016/S0305-4403(95)80170-7)

Trinkaus, Erik. 2011. Late Pleistocene adult mortality patterns and modern human establishment. *Proceedings of the National Academy of Sciences* 108(4):1267-1271. <https://doi.org/10.1073/pnas.1018700108>
