# Supplementary material for: The Role of Large Mammals as Vitamin C Sources for MIS 3 Hominins
Source: MDPI journal article supplement (doi:10.3390/quat6010020), 2023-03-10
Supplement: s1 [file s1]

**Supporting Table S3.** Organ weights, kcal and ascorbic acid content of a medium-sized reed deer (325 kg)<sup>a</sup>

|                          | Body%   | g         | Energy<br>kcal/g | Total kcal | Vit C<br>mg/g | Vit C in organs<br>mg | Reference for Vit C                                                                 | Reference for %organ wt                       | Reference for Energy                                                                     |
|--------------------------|---------|-----------|------------------|------------|---------------|-----------------------|-------------------------------------------------------------------------------------|-----------------------------------------------|------------------------------------------------------------------------------------------|
| <i>Viscera</i>           |         |           |                  |            |               |                       |                                                                                     |                                               |                                                                                          |
| Adrenal                  | 0.0073  | 23.3      | 0.680            | 16         | 0.3920        | 9.1                   | Rodahl (1949) <sup>b</sup>                                                          | Crile and Quiring (1940) <sup>c</sup>         | Estimated as testes                                                                      |
| Bile                     | 0.0398  | 127.4     | 0.045            | 6          | 0.0100        | 1.3                   | Rodahl (1949) <sup>b</sup>                                                          | Kirton <i>et al.</i> (1972) <sup>d</sup>      | Derived from Barrett (2012) <sup>e</sup>                                                 |
| Blood                    | 3.4052  | 10,896.6  | 0.700            | 7628       | 0.0007        | 7.6                   | Richmond <i>et al.</i> (1940) <sup>f</sup>                                          | Awuk and Tamir (2007) <sup>f</sup>            | Nollet and Toldrá (2011) <sup>f</sup>                                                    |
| Brain                    | 0.2476  | 792.3     | 1.234            | 978        | 0.1280        | 101.4                 | Rodahl (1949) <sup>b</sup>                                                          | Crile and Quiring (1940) <sup>c</sup>         | Guil-Guerrero (2017) <sup>g</sup>                                                        |
| Digestive tract          | 5.3000  | 16,960.0  | 0.960            | 16,282     | 0.0045        | 76.3                  | Rodahl (1949) <sup>b</sup>                                                          | Crile and Quiring (1940) <sup>f</sup>         | Kuhnlein and Soueida (1992) <sup>h</sup>                                                 |
| Epididymis               | 0.1098  | 351.3     | 0.680            | 239        | 0.0420        | 14.8                  | Rodahl (1949) <sup>b</sup>                                                          | Bercovitch and Rodriguez (1993) <sup>i</sup>  | Estimated as testes                                                                      |
| Eyes                     | 0.0393  | 125.9     | 3.260            | 410        | 0.0070        | 0.9                   | Rodahl (1949) <sup>b</sup>                                                          | Crile and Quiring (1940) <sup>c</sup>         | USDA, FDC ID: 169801 <sup>h</sup>                                                        |
| Heart                    | 0.8468  | 2709.8    | 1.120            | 3035       | 0.0260        | 70.5                  | Fediuk (2002) <sup>h</sup>                                                          | Crile and Quiring (1940) <sup>c</sup>         | Kuhnlein and Soueida (1992) <sup>h</sup> ;<br>Kuhnlein <i>et al.</i> (2002) <sup>h</sup> |
| Kidney                   | 0.2793  | 893.6     | 0.917            | 819        | 0.0888        | 79.4                  | Fediuk <i>et al.</i> (2002) <sup>h</sup>                                            | Crile and Quiring (1940) <sup>c</sup>         | Guil-Guerrero (2017) <sup>g</sup>                                                        |
| Liver                    | 1.9559  | 6258.9    | 1.240            | 7761       | 0.1782        | 1115.3                | Fediuk <i>et al.</i> (2002) <sup>h</sup> ; Hassan <i>et al.</i> (2012) <sup>h</sup> | Crile and Quiring (1940) <sup>c</sup>         | Kuhnlein <i>et al.</i> (2002) <sup>h</sup>                                               |
| Lung                     | 1.9510  | 6243.2    | 1.090            | 6805       | 0.0810        | 505.7                 | Rodahl (1949) <sup>b</sup>                                                          | Crile and Quiring (1940) <sup>c</sup>         | Kuhnlein and Soueida (1992) <sup>h</sup>                                                 |
| Pancreas                 | 0.1405  | 449.6     | 2.350            | 1057       | 0.0390        | 17.5                  | Rodahl (1949) <sup>b</sup>                                                          | Sebsibe <i>et al.</i> (2007) <sup>f</sup>     | USDA, FDC ID: 169452 <sup>j</sup>                                                        |
| Spleen                   | 0.0175  | 56.0      | 0.901            | 50         | 0.0600        | 3.4                   | Rodahl (1949) <sup>b</sup>                                                          | Crile and Quiring (1940) <sup>c</sup>         | Guil-Guerrero (2017) <sup>g</sup>                                                        |
| Testes                   | 0.5160  | 1651.3    | 0.680            | 1123       | 0.1820        | 300.5                 | Rodahl (1949) <sup>b</sup>                                                          | Kirton <i>et al.</i> (1972) <sup>d</sup>      | USDA, FDC ID: 172619 <sup>d</sup>                                                        |
| Tongue                   | 0.1891  | 605.1     | 2.600            | 1573       | 0.0100        | 6.1                   | Rodahl (1949) <sup>b</sup>                                                          | Kirton <i>et al.</i> (1972) <sup>d</sup>      | USDA, FDC ID: 168985 <sup>h</sup>                                                        |
| Thyroid                  | 0.0175  | 56.0      | 0.680            | 38         | 0.0380        | 2.1                   | Rodahl (1949) <sup>b</sup>                                                          | Crile and Quiring (1940) <sup>c</sup>         | Estimated as testes                                                                      |
| <i>Total viscera</i>     | 15.0626 | 48,200.2  | -                | 47,819     | -             | 2311.9                | -                                                                                   | -                                             | -                                                                                        |
| Bones                    | 14.2750 | 45,680.0  | -                | -          | -             | -                     | -                                                                                   | Adamczewski <i>et al.</i> (1997) <sup>b</sup> | -                                                                                        |
| Bone marrow              | 2.5000  | 8000.0    | 4.837            | 38,696     | 0.0000        | 0.0000                | Hassan <i>et al.</i> (2012) <sup>h</sup>                                            | Nieminen and Laitinen (1986) <sup>h</sup>     | Guil-Guerrero (2017) <sup>g</sup>                                                        |
| Dissectible fat          | 17.7099 | 56,671.8  | 7.262            | 411,550    | 0.0000        | 0.0000                | Geraci and Smith (1979) <sup>h</sup> ;<br>Hassan <i>et al.</i> (2012) <sup>h</sup>  | Adamczewski <i>et al.</i> (1997) <sup>b</sup> | Guil-Guerrero (2017) <sup>c</sup>                                                        |
| <i>Total fat</i>         | 20.2099 | 64,671.8  | -                | 450,246    | -             | 0.0000                | -                                                                                   | -                                             | -                                                                                        |
| <i>Muscles</i>           | 41.9084 | 134,106.9 | 1.018            | 136,521    | 0.0000        | 0.0000                | Lee <i>et al.</i> (2007) <sup>c</sup> ;<br>USDA, FDC ID: 173855 <sup>c</sup>        | Adamczewski <i>et al.</i> (1997) <sup>b</sup> | Guil-Guerrero (2017) <sup>c</sup>                                                        |
| <i>Skin</i>              | 9.0043  | 28,813.8  | 5.44             | 156,747    | 0.0050        | 144.1                 | USDA, FDC ID: 2341308 <sup>k</sup>                                                  | Awuk and Tamir (2007) <sup>f</sup>            | USDA, FDC ID: 2341308 <sup>k</sup>                                                       |
| <i>Rest</i> <sup>l</sup> | 3.6675  | 11,735.9  | 1.0000           | 11,736     | 0.0010        | 11.7                  | Estimated                                                                           | Estimated                                     | Estimated                                                                                |

<sup>a</sup> Nowak and Walker (1999); <sup>b</sup> Muskox sample; <sup>c</sup> Red deer sample; <sup>d</sup> Sheep sample; <sup>e</sup> Based on 0.51% fats in bile; <sup>f</sup> Goat sample; <sup>g</sup> Mean for several food animals; <sup>h</sup> *Rangifer* sample; <sup>i</sup> Macaco samples; <sup>j</sup> Beef sample; <sup>k</sup> Pork skin rinds; <sup>l</sup> Tendon, blood vessels, etc.

## References

- Adamczewski, J. Z., P. F. Flood, and A. Gunn. 1997. Seasonal Patterns in Body Composition and Reproduction of Female Muskoxen (*Ovibos Moschatus*). *Journal of Zoology* 241(2):245-269. <https://doi.org/10.1111/j.1469-7998.1997.tb01956.x>
- Alfaia, C.M., M.S. Madeira, J. Pestana, D. Coelho, P.A. Lopes, P. A., Toldrá, and J. A. M. Prates. 2019. Pork Byproducts. Byproducts from Agriculture and Fisheries. In Simpson, Benjamin K., Alberta N. Aryee, and Fidel Toldrá, eds. *Byproducts from Agriculture and Fisheries* (pp. 19–41). John Wiley & Sons Ltd.
- Awuk, Asnakew, and Berhan Tamir. 2007. Feed Intake, Weight Gain and Carcass Yield Characteristics of Intact Hararghe Highland Male Goats Fed on Different Hay to Concentrate Ratios. *East African Journal of Sciences* 1(1):45-54. <https://doi.org/10.4314/eajsci.v1i1.40340>
- Barrett, Kim E. 2012. *Ganong's review of medical physiology* (24th ed.). New York: McGraw-Hill Medical.
- Bercovitch, Fred B., and Jose F. Rodriguez. 1993. Testis size, epididymis weight, and sperm competition in rhesus macaques. *American journal of primatology* 30(2):163-168. <https://doi:10.1002/ajp.1350300208>
- Crile, George, and Daniel P. Quiring. 1940. A record of the body weight and certain organ and gland weights of 3,690 animals. *Ohio Journal of Science* 15:219-259. <https://doi.org/10.1016/B978-0-12-815599-8.00010-1>
- Fediuk, Karen, Nick Hidioglou, René Madère, and Harriet V. Kuhnlein. 2002. Ascorbic acid in Inuit traditional food and women's diets. *Journal of food Composition and Analysis* 15(3):221-235. <https://doi.org/10.1006/jfca.2002.1053>
- Geraci, Joseph R., and Thomas G. Smith. 1979. Ascorbic acid in the diet of Inuit hunters from Holman, Northwest Territories. *Arctic* 135-139.
- Guil-Guerrero, José L. 2017. Evidence for chronic omega-3 fatty acids and ascorbic acid deficiency in Palaeolithic hominins in Europe at the emergence of cannibalism. *Quaternary Science Reviews* 157:176-187. <https://doi.org/10.1016/j.quascirev.2016.12.016>
- Hassan, Ammar Ali, Torkjel M. Sandanger, and Magritt Brustad. 2012. Level of selected nutrients in meat, liver, tallow and bone marrow from semi-domesticated reindeer (*Rangifer t. tarandus* L.). *International journal of circumpolar health* 71(1):17997. <https://doi.org/10.3402/ijch.v71i0.17997>

Kirton, A. H., P. D. Fourie, and K. E. Jury. 1972. Growth and development of sheep: III. Growth of the carcass and non-carcass components of the Southdown and Romney and their cross and some relationships with composition. *New Zealand Journal of Agricultural Research* 15:214-227.

<https://doi.org/10.1080/00288233.1972.10421249>

Kuhnleini, Harriet V., and Rula Soueida. 1992. Use and nutrient composition of traditional Baffin Inuit foods. *Journal of Food Composition and Analysis* 5(2):112-126. [https://doi.org/10.1016/0889-1575\(92\)90026-G](https://doi.org/10.1016/0889-1575(92)90026-G)

Kuhnlein, H. V., H. M. Chan, D. Leggee, and V. Barthet. 2002. Macronutrient, mineral and fatty acid composition of Canadian Arctic traditional food. *Journal of food composition and analysis* 15(5), 545-566. <https://doi.org/10.1006/jfca.2002.1066>

Lee, Chong-Eon, Pil-Nam Seong, Woon-Young Oh, Moon-Suck Ko, Kyu-Il Kim, and Jae-Hong Jeong. 2007. Nutritional characteristics of horsemeat in comparison with those of beef and pork. *Nutrition research and practice* 1(1):70-73. <https://doi.org/10.4162/nrp.2007.1.1.70>

Nieminen, Mauri, and Matti Laitinen. 1986. Bone marrow and kidney fat as indicators of condition in reindeer. *Rangifer* 6:219-226.

<https://doi.org/10.7557/2.6.2.649>

Nollet, Leo M. L., and Fidel Toldrá, eds. 2011. *Handbook of Analysis of Edible Animal By-Products*. CRC PressRichmond, M. S., Satterfield, G. H., Grinnells, C. D., & Dann, W. J. (1940). Ascorbic Acid Content of Goat's Milk and Blood: Influence of Ascorbic Acid Injection and Diet: Three Figures. *The Journal of Nutrition*, 20(2), 99-108. <https://doi.org/10.1093/jn/20.2.99>

Richmond, Martha S., G. H. Satterfield, C. D. Grinnells, and W. J. Dann. 1940. Ascorbic Acid Content of Goat's Milk and Blood: Influence of Ascorbic Acid Injection and Diet: Three Figures. *The Journal of Nutrition* 20(2):99-108. <https://doi.org/10.1093/jn/20.2.99>

Rodahl, Kåre 1949. Vitamin sources in Arctic regions. *Norsk Polarinstitutt Skrifter* 91:1-47.

Sebsibe, A., N. H. Casey, W. A. Van Niekerk, A. Tegegne, and R. J. Coertze. 2007. Growth performance and carcass characteristics of three Ethiopian goat breeds fed grainless diets varying in concentrate to roughage ratios. *South African Journal of Animal Science* 37(4):221-232.

<https://doi.org/10.4314/sajas.v37i4.4094>

USDA National Nutrient Database for Standard Reference Legacy Release. <https://ndb.nal.usda.gov>
